# Supplementary material for: Concomitant inhibition of TLR-4 and SGLT2 by phloretin and empagliflozin prevents diabetes-associated ischemic acute kidney injury
Source: Royal Society of Chemistry journal article supplement (doi:10.1039/d3fo01379k), 2023-01-01
Supplement: d3fo01379k2.xlsx [file d3fo01379k2.xlsx]

## Sheet: Figure 2
Figure 2	Plasma and urine biochemistry
2a	Glucose	NC	DC	DCIR	DCIR+P50	DCIR+P100	DCIR+EMP	DCIR+COMB
		6.75106	13.7834	12.3141	8.90764	6.23535	9.85402	7.33982
		7.66852	11.6268	14.964	8.04782	8.376	8.35361	6.75183
		6.376	11.8612	13.158	7.73558	7.45429	9.05028	6.36659
		6.0947	13.5021	11.8612	7.75106	7.26676	8.55637	4.92701
		7.65729	12.2363	13.1889	9.27046	6.61041	9.18573	6.24493
		6.5656	14.235	14.654	9.656	7.5632	10.1586	6.44769
2b	BUN	NC	DC	DCIR	DCIR+P50	DCIR+P100	DCIR+EMP	DCIR+COMB
		15.3104	18.207	23.1726	18.6208	15.7242	19.6044	15.0763
		12.8277	20.276	22.345	17.7932	17.3794	17.1874	15.1117
		12.0001	24.8764	21.9312	16.5518	18.138	17.2498	14.7918
		14.4828	17.7932	22.7588	17.7932	15.7242	19.3616	16.1319
		14.0691	19.0346	19.8622	20.276	16.5518	18.2713	17.3685
		13.5685	20.1895	23.5647	19.2652	19.1315	16.6877	16.535
2c	Creatinine	NC	DC	DCIR	DCIR+P50	DCIR+P100	DCIR+EMP	DCIR+COMB
		8.25345	20.5134	25.1598	9.58184	9.64582	12.722	8.04124
		8.03818	24.4923	26.9219	11.2534	8.02565	14.3055	8.04126
		8.0322	22.3703	28.4798	9.64582	9.8245	16.0764	8.08654
		9.64502	20.0713	26.3976	8.03818	9.14579	14.4687	6.43055
		8.03818	28.0291	28.6566	9.45824	9.58327	12.8611	10.2535
2d	pNGAL	NC	DC	DC-I/R	DC-I/R+P50	DC-I/R+P100	DC-I/R+EMP	DC-I/R+COMB
		1394.26	1903	3189.6	3483	3364.67	2916.33	2434.62
		1963	1998.14	3291.59	3194.63	3319.78	2794.67	2339.56
		1836.33	2003.02	3004.67	2964.61	3378	3059.47	2131.33
		1524.67	2153	3774.15	3233	3363	3126.33	2001.7
		1756.47	2106.33	3701.41	3021.57	2921.14	3171.45	2299.48
		1645	2147.41	3245.41	3000.28	3100	2846	2165.24
2e	uNGAL	NC	DC	DC-I/R	DC-I/R+P50	DC-I/R+P100	DC-I/R+EMP	DC-I/R+COMB
		1613.3	1896.67	7263.62	5530	3713.39	6213.23	2113.29
		1713.33	1796.81	11246.7	6713.24	5696.74	4680	1196.67
		1650.79	1280.65	9730	5796.67	5463.3	4813.33	2463.37
		1980	2530	8163.33	3296.48	4446.49	4396.67	3863.36
		2130.04	2263.31	10430	5663.35	4546.67	4780.86	1430
		2080	1863.33	9696.67	2913.07	4963.42	2680.26	2363.34
2f	KIM1	NC	DC	DC-I/R	DC-I/R+P50	DC-I/R+P100	DC-I/R+EMP	DC-I/R+COMB
		0.0627	0.077558	1.5706	0.717241	0.75192	0.562	0.4655
		0.0701	0.075081	2.23267	1.04422	0.467055	0.6544	0.5465
		0.08	0.081273	1.45541	0.964949	0.65779	0.5873	0.4379
		0.0487	0.068888	1.42569	0.689993	0.611964	0.5759	0.43658
		0.0664	0.066411	2.55217	0.823755	0.642928	0.5897	0.3156
		0.0565	0.067493	2.65432	0.756874	0.507927	0.6546	0.56468

## Sheet: Figure 3
Figure 3	H and E
		Tubular injury score
NC	DC	DC-I/R	DC-I/R+P50	DC-I/R+EMP	DC-I/R+COMB
0.1	1.5	2.5	2	2	1.5
0.3	1.8	3	2.2	2	1.6
0.2	1.9	2.8	2.5	2.1	1.4
0.3	2	2.7	2.5	2.3	1.7
0.2	1.5	2.61	2.4	2.4	1.5
0.3	1.6	2.5	2.2	2.5	1.5

## Sheet: Figure 4
	Figure 4	Immunohistochemistry
A	HMGB1	NC	DC	DC-I/R	DC-I/R+P50	DC-I/R+EMP	DC-I/R+COMB
	%HMGB1 positive area	5.852	12.1245	23.81	16.952	16.482	9.081
		6.168	10.3654	24.7754	15.3265	19.7696	11
		3.7545	8.836	27.2322	18.475	18.1254	10.4563
		3.15	8.978	22.356	16.2643	16.7458	10.654
		4.6	9.9	24.25	18.7856	15.2653	12.235
		4.23	9.23	25.36	19.235	14.295	11.5655
B	MyD88	NC	DC	DC-I/R	DC-I/R+P50	DC-I/R+EMP	DC-I/R+COMB
	%MyD88 positive area	9.78945	19.5212	41.555	17.8545	27.5645	12.381
		7.396	15.3326	41.7894	16.714	25.1426	13.427
		8.6659	22.7988	48.8584	19.7	28.901	14.6666
		8.87944	22.3333	44.7412	23.3654	27.36	15.326
		7.878	20.4747	42.36	20.4868	28.65	16.235
		8.2547	19.1355	39.265	21.6369	26.365	14.265
C	MCP1	NC	DC	DC-I/R	DC-I/R+P50	DC-I/R+EMP	DC-I/R+COMB
	%MCP1 positive area	3.4111	10.5468	15.7789	12.988	10.2548	6.971
		4.6648	11.1254	18.652	13.699	11.1254	6.2171
		4.2278	9.7854	16.2548	12.4568	12.268	8.5423
		4.6548	8.3654	16.4569	12.34	10.3256	8.265
		5.365	12.2647	18.236	14.265	11.3223	7.245
		6.235	11.3564	17.265	13.654	12.325	8.563
D	TNF alpha	NC	DC	DC-I/R	DC-I/R+P50	DC-I/R+EMP	DC-I/R+COMB
	%TNF alpha positive area	1.421	6.039	22.7458	14.2235	13.9421	9.01254
		1.6212	7.7456	24.6589	13.696	12.5648	10.2456
		1.56	8.865	25.415	15.165	14.2456	8.05725
		2.362	7.985	22.3654	14.256	12.3256	8.946
		2.452	8.654	20.3699	16.325	13.264	9.456
		2.3647	8.1	24.7854	16.2541	12.345	10.26

## Sheet: Figure 5
	Figure 5A
	Phloretin XTT	control	6.25 μM	12.5 Μm	25 μM	50 μM	100 μM	200 μM
		100	87.489	95.36	87.53	73.75	68.36	22.97
		100	92.544	93.287	92.75	72.64	69.52	24.487
		100	90.798	92.4895	88.215	70.5648	67.489	26.895
	Empagliflozin XTT	Control	12.5 nM	25 nM	50 nM	100 nM	200 nM	400 nM	800 nM
		100	62.5046	81.7141	80.8275	77.2811	91.9099	79.4976	82.3051
		100	58.5046	84.888	82.7568	75.2549	96.4856	82.6589	83.5485
		100	56.259	84.257	81.56	78.2546	93.5489	80.4985	82.7895
	Combination XTT	Control	6.25+12.5	12.5+25	25+50	50+100	100+200	200+400	400+800
		100	90.2845	85.9993	89.9889	76.5423	66.051	61.1747	54.8208
		100	92.23	88.987	90.235	72.65	68.123	64.546	50.12
		100	91.4879	85.456	91.2684	73.564	64.238	62.235	50.24
	Figure	5B	% cell apoptosis
		Q1 LR	Q1 UR	LR+UR
	NG	1.6	2.88	4.48
	HG	3.02	4.5	7.52
	HGHR	3.88	7.06	10.94
	HGHR+P50	2.06	2.74	4.8
	HGHR+EMP	2.72	1.94	4.66
	HGHR+COMB	1.54	3.08	4.62
		Q1 LL	Live cell population
		Q1LR	Early apoptosis
		Q1UR	Late apoptosis
		Q1UL	Dead cells

## Sheet: Figure 6
	Figure 6	TLR4 immunofluroscence
NG	HG	HG-H/R	HG-H/R+P50	HG-H/R+E100	HG-H/R+COMB
3.664	5.113	14.751	5.382	10.981	3.743
3.13	4.98	15.611	6.542	8.935	5.777
4.5	6.57	12.74	6.404	9.9123	4.764

## Sheet: Figure 7
	Figure 7	Western blotting raw data
		In vitro Western
7B	TLR4/β-actin	NG	HG	HG-H/R	HG-H/R+P50	HG-H/R+EMP	HG-H/R+COMB
		100	172.541	210.193	132.892	170.257	118.646
		100	180	219.26	141.235	167.755	110.567
		100	168.265	200.564	150.459	158.235	120.235
7C	p-NF-κβ/β-actin	NG	HG	HG-H/R	HG-H/R+P50	HG-H/R+EMP	HG-H/R+COMB
		100	218.907	317.616	253.034	240.927	169.356
		100	228.365	335.256	260.325	236.124	150.154
		100	200.356	348	245.25	255.369	155.964
7D	p-IK-βα/β-actin	NG	HG	HG-H/R	HG-H/R+P50	HG-H/R+EMP	HG-H/R+COMB
		100	132.252	210.474	184.855	170.219	104.747
		100	158.2	226.23	164.26	158	123
		100	176.235	223.6	191.26	188	111
7E	Cleaved parp/β-actin	NG	HG	HG-H/R	HG-H/R+P50	HG-H/R+EMP	HG-H/R+COMB
		100	124.561	182.116	60.0753	80.2385	21.9246
		100	132.23	200.235	70.235	88.235	12.35
		100	135.23	219.265	78.235	71.235	15.0235
7F	Caspase 3/β-actin	NG	HG	HG-H/R	HG-H/R+P50	HG-H/R+EMP	HG-H/R+COMB
		100	110.233	150.849	83.7407	64.2002	50.4227
		100	123.14	156.246	87.454	77.398	61.1741
		100	115.323	153.154	82.256	70.254	52.2323
				In vivo Western
7H	TLR4/β-actin		NC	DC	DC-I/R	DC-I/R+P50	DC-I/R+EMP	DC-I/R+COMB
			100	149.719	177.284	153.985	164.738	88.1731
			100	163.564	188.265	167.265	170.256	78.256
			100	148.655	200.365	160.2	162.237	70.2655
7I	p-NF-κβ/β-actin		NC	DC	DC-I/R	DC-I/R+P50	DC-I/R+EMP	DC-I/R+COMB
			100	228.317	342.462	169.155	148.962	108.929
			100	210.235	350.265	188.256	154.237	81.2356
			100	223.256	320.654	170.355	164.216	91.1986
7J	p-IK-βα/β-actin		NC	DC	DC-I/R	DC-I/R+P50	DC-I/R+EMP	DC-I/R+COMB
			100	232.25	320.706	276.497	302.281	173.433
			100	250.26	352.235	262.356	267.235	151.455
			100	222.236	336.246	250.124	290.232	165.266
7K	Cleaved parp/β-actin		NC	DC	DC-I/R	DC-I/R+P50	DC-I/R+EMP	DC-I/R+COMB
			100	155.231	235.285	168.264	150.582	142.478
			100	136.25	203.326	151.236	166.321	130.256
			100	148	247.23	176.747	137.212	156.278
7L	Caspase 3/β-actin		NC	DC	DC-I/R	DC-I/R+P50	DC-I/R+EMP	DC-I/R+COMB
			100	130.954	147.428	50.359	70.5782	36.7485
			100	118.355	168.654	89.2554	54.2568	26.4852
			100	110.656	136.236	74.6547	65.4133	17.265

## Sheet: Figure 8
Figure 8
	TLR4 immunofloroscence
NG	HG	HG-H/R	HG-H/R+P50	HG-H/R+TAK242	HG-H/R+COMB
3.571	7.308	13.672	6.888	5.904	3.91
2.783	4.044	11.129	5.484	8.394	2.972
3.199	6.314	14.56	6.845	6.23	6.881
